# Supplementary material
Source: PubMed Central journal article supplement (PMC7979514)
Supplement: NIHMS1673512-supplement-1.pdf [file NIHMS1673512-supplement-1.pdf]

**Supplemental Figure 1.** *Trauma Team Activation Criteria at Zuckerberg San Francisco General Hospital (ZSFG).* PEDI- pediatric, MVC- motor vehicle collision, MCC- motorcycle collision, PVA- pedestrian vs auto, BVA- bicycle vs auto, GSW- gunshot wound, SW- stab wound, MOI-mechanisms of injury, TTA-trauma team activation, SBP-systolic blood pressure, ED- emergency department.

**Supplemental Figure 2.** *Graphical representation of an interrupted time-series model and parameters.*

1. Pre-intervention trend = the slope prior to the intervention. 2. Level shift = the instantaneous change associated with the intervention. 3. Post-intervention trend = slope after the intervention. Change in slope = Post-intervention trend – pre-intervention trend. Point estimates, standard errors, confidence intervals and p-values are reported for each of these parameters.

**Supplemental Figure 3.** *Comparison of number of monthly reported violent crimes reported in San Francisco before and after shelter-in-place. A) Box and whiskers plots of historical violent crimes reported by month 2016-2019 compared to 2020 values (diamonds). B) ITSA model for violent crimes reported by month adjusting for historical variation, showing seasonal monthly*

## Trauma Team Activation Criteria at ZSFG

### Low Acuity

- PEDI (<15yo) or 10 feet, whichever is less.
- MVC with ejection, death of passenger, abdominal seatbelt sign OR passenger
- MCC, motorized vehicles, bicycles, skateboards, scooters, etc. with > 20mph crash or with major impact
- PVA or BVA with estimated collision speed > 10 mph
- GSW or SW to head, neck, or torso not meeting 900 TTA criteria
- Re-triage of trauma patients meeting any
- GCS 9-11 with clear evidence of traumatic etiology
- Traumatic paraplegia or focal neuro deficits.
- PEDI with concerning MOI.
- with major MOI not meeting 900 TTA criteria
- Patients ≥ 65 yrs with significant MOI and:
  - SBP < 110 OR
  - any long bone fractures OR
  - taking any major anticoagulation
- ED Attending, Trauma Senior Resident or ED Charge Nurse discretion.

### High Acuity

- Confirmed SBP < 90 in adult or age specific hypotension in children.
 

| AGE      | Systolic Blood Pressure |
|----------|-------------------------|
| <1 yr    | SBP < 60                |
| 1-10 yrs | SBP < (70 + 2 x age)    |
| > 10 yrs | SBP < 90                |
- Clinical evidence of hemorrhagic shock when BP measurements not available (Absent pulses and/or cutaneous signs of shock may be used.
- Respiratory compromise from trauma or burns.
- Intubated/need for intubation - from trauma or burns.
- Re-triage/transfer of patients from other facilities meeting 900 criteria.
- GCS < 9 with clear evidence of major head trauma or major MOI
- GSW or SW to neck or torso (acute injuries < 4 hours old)
- GSW or SW to extremity proximal to elbow/knee with active hemorrhage, expanding hematoma or pulse deficit
- Traumatic amputation or mangled extremity proximal to wrist or ankle.
- Traumatic quadriplegia.
- MOI and abdominal pain
- otherwise meeting 900 criteria.
- ED Attending or Trauma Senior Resident discretion.
- ED Charge Nurse may activate for patients not meeting specific 900 TTA criteria after consultation with the ED Attending

**Supplemental Figure 1.** *Trauma Team Activation Criteria at Zuckerberg San Francisco General Hospital (ZSFG).* PEDI- pediatric, MVC- motor vehicle collision, MCC- motorcycle collision, PVA- pedestrian vs auto, BVA- bicycle vs auto, GSW- gunshot wound, SW- stab wound, MOI-mechanisms of injury, TTA-trauma team activation, SBP-systolic blood pressure, ED- emergency department.

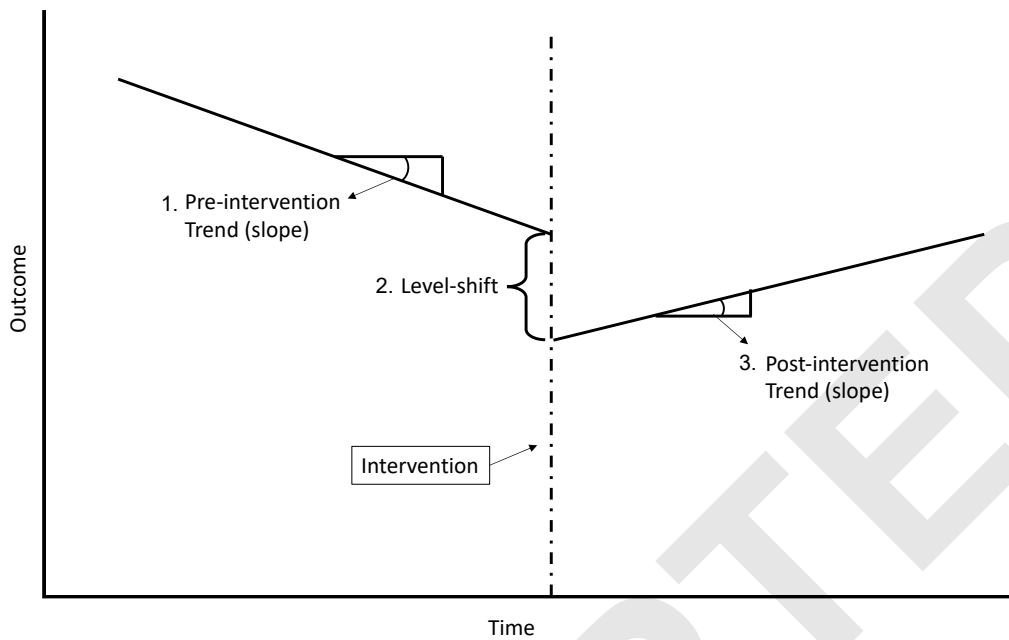

**Supplemental Figure 2.** Graphical representation of an interrupted time-series model and parameters.

1. Pre-intervention trend = the slope prior to the intervention. 2. Level shift = the instantaneous change associated with the intervention. 3. Post-intervention trend = slope after the intervention.

Change in slope = Post-intervention trend – pre-intervention trend. Point estimates, standard errors, confidence intervals and p-values are reported for each of these parameters.

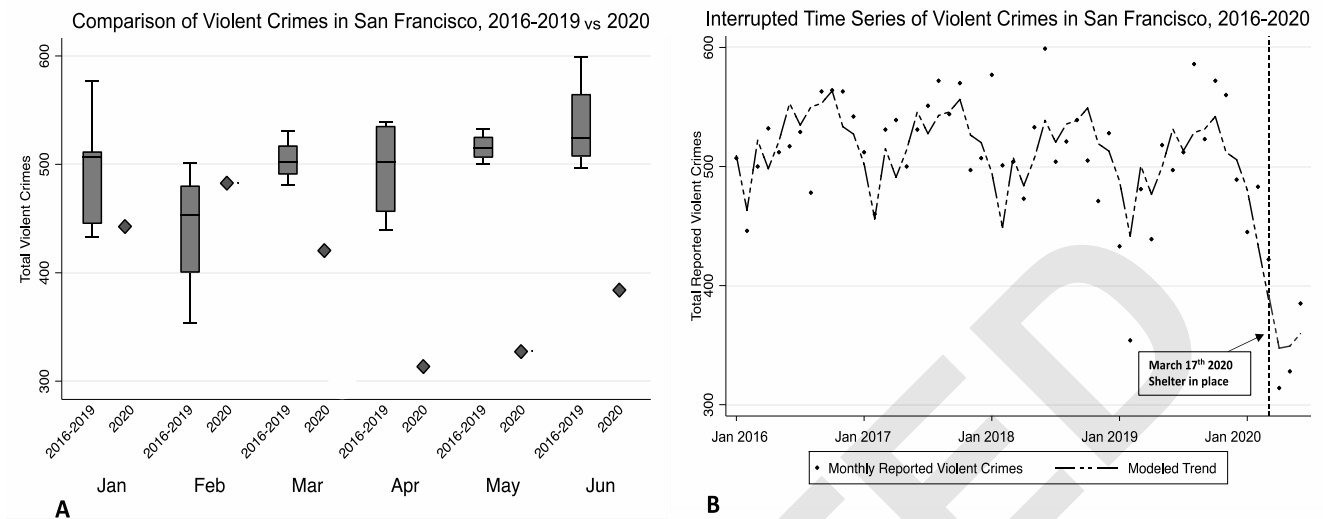

**Supplemental Figure 3.** Comparison of number of monthly reported violent crimes reported in San Francisco before and after shelter-in-place. **A)** Box and whiskers plots of historical violent crimes reported by month 2016-2019 compared to 2020 values (diamonds). **B)** ITSA model for violent crimes reported by month adjusting for historical variation, showing seasonal monthly trends 2016-2019, but a large level shift associated with shelter-in-place of 100 fewer violent crimes ( $p < 0.01$ ), and a trend of 22 fewer violent crimes per month starting after shelter-in-place when adjusting for month ( $p = 0.05$ ). Lags specified for autocorrelation: 12 months. See Supplemental Table 6 for complete regression model results

**Supplemental Table 1. Long-Term ITSA Model for the Association of Shelter-in-Place with Trauma Volume by Month (January 2015-June 2020)**

| Variable                                                | Coefficient | Std Error | P-value | CI-low | CI-high |
|---------------------------------------------------------|-------------|-----------|---------|--------|---------|
| Pre-shelter-in-place trend (Jan 2015-Jan 2020)          | -2.75       | 0.23      | <0.01   | -12.13 | -3.20   |
| Level Shift associated with shelter-in-place            | -25.78      | 9.89      | 0.01    | -2.61  | -45.64  |
| Slope shift associated with shelter-in-place            | -4.12       | 3.86      | 0.29    | -1.07  | -11.86  |
| Trend after start of shelter-in-place (March-June 2020) | -6.87       | 3.80      | 0.08    | -14.50 | 0.76    |
| <b>Month (Reference, January)</b>                       |             |           |         |        |         |
| February                                                | -16.42      | 14.03     | 0.25    | -1.17  | -44.59  |
| March                                                   | -21.04      | 16.34     | 0.20    | -1.29  | -53.84  |
| April                                                   | -16.94      | 13.94     | 0.23    | -1.22  | -44.92  |
| May                                                     | 11.83       | 10.59     | 0.27    | 1.12   | -9.43   |
| June                                                    | 27.26       | 13.93     | 0.06    | 1.96   | -0.70   |
| July                                                    | 20.70       | 21.69     | 0.34    | 0.95   | -22.85  |
| August                                                  | 13.45       | 19.80     | 0.50    | 0.68   | -26.30  |
| September                                               | 20.20       | 12.95     | 0.13    | 1.56   | -5.80   |
| October                                                 | 48.65       | 13.07     | <0.01   | 3.72   | 22.41   |
| November                                                | 17.09       | 10.17     | 0.10    | 1.68   | -3.32   |
| December                                                | 7.64        | 20.98     | 0.72    | 0.36   | -34.49  |

Interrupted time-series analysis model (ITSA) with Newey-West standard errors, lags specified for autocorrelation: 12 months. Coefficients represent the estimates for the change in number of trauma team activations per month. CI-95% confidence intervals.

**Supplemental Table 2. Short-Term ITSA Model for the Association of Shelter-in-Place with Trauma Volume by Week (September 2019-June 2020)**

| <b>Variable</b>                      | <b>Coefficient</b> | <b>Std Error</b> | <b>P-Value</b> | <b>CI-low</b> | <b>CI-high</b> |
|--------------------------------------|--------------------|------------------|----------------|---------------|----------------|
| Trend, 6 months pre-Shelter-in-place | 0.06               | 0.23             | 0.80           | -0.41         | 0.53           |
| Level Shift March 17th 2020          | -28.49             | 3.77             | <0.01          | -36.11        | -20.88         |
| Slope Shift March 17th 2020          | 1.70               | 0.32             | <0.01          | 1.06          | 2.35           |
| Trend March 17th-June 30th 2020      | 1.76               | 0.22             | <0.01          | 1.32          | 2.21           |

Interrupted time-series analysis model (ITSA) with Newey-West standard errors, lags specified for autocorrelation: 4 weeks. Coefficients represent the estimates for the change in number of trauma team activations per week. CI-95% confidence intervals.

ACCEPTED

**Supplemental Table 3. Long-Term ITSA Model for Association of Shelter-in-Place with Pediatric Trauma Volume (January 2015-June 2020)**

| <b>Variable</b>                                         | <b>Coefficient</b> | <b>Std Error</b> | <b>P-value</b> | <b>CI-low</b> | <b>CI-high</b> |
|---------------------------------------------------------|--------------------|------------------|----------------|---------------|----------------|
| Pre-shelter-in-place trend (Jan 2015-Jan 2020)          | -0.17              | 0.03             | <0.01          | -0.23         | -0.10          |
| Level Shift associated with shelter-in-place            | -7.70              | 2.05             | <0.01          | -11.81        | -3.59          |
| Slope shift associated with shelter-in-place            | -0.58              | 0.92             | 0.53           | -2.43         | 1.27           |
| Trend after start of shelter-in-place (March-June 2020) | -0.75              | 0.94             | 0.43           | -2.67         | 1.14           |
| <b>Month (Reference, January)</b>                       |                    |                  |                |               |                |
| February                                                | 1.50               | 1.66             | 0.37           | -1.83         | 4.82           |
| March                                                   | 3.78               | 1.57             | 0.02           | 0.63          | 6.93           |
| April                                                   | 3.71               | 1.55             | 0.02           | 0.60          | 6.82           |
| May                                                     | 8.31               | 2.59             | <0.01          | 3.11          | 13.51          |
| June                                                    | 6.07               | 3.20             | 0.06           | -0.35         | 12.49          |
| July                                                    | 5.63               | 2.11             | 0.01           | 1.40          | 9.87           |
| August                                                  | 2.00               | 1.78             | 0.27           | -1.58         | 5.57           |
| September                                               | 7.37               | 3.69             | 0.05           | -0.05         | 14.78          |
| October                                                 | 8.13               | 2.34             | <0.01          | 3.43          | 12.84          |
| November                                                | 3.20               | 3.10             | 0.31           | -3.03         | 9.42           |
| December                                                | 1.96               | 2.11             | 0.36           | -2.28         | 6.21           |

Interrupted Time-series analysis model (ITSA) using ordinary least squares regression and Newey-West standard errors, lags specified: 12 months. Coefficients represent the estimates for the change in number of pediatric trauma team activations per month.

**Supplemental Table 4. Short-Term ITSA Model for Association of Shelter-in-Place with Pediatric Trauma Team Volume (September 2019-June 2020)**

| <b>Variable</b>                 | <b>Coefficient</b> | <b>Std Error</b> | <b>P-Value</b> | <b>CI-low</b> | <b>CI-high</b> |
|---------------------------------|--------------------|------------------|----------------|---------------|----------------|
| 6 months pre-Shelter-in-place   | -0.03              | 0.02             | 0.29           | -0.08         | 0.02           |
| Level Shift March 17th 2020     | -1.12              | 0.45             | 0.02           | -2.04         | -0.21          |
| Slope Shift March 17th          | 0.10               | 0.05             | 0.03           | 0.01          | 0.20           |
| Trend March 17th-June 30th 2020 | 0.08               | 0.04             | 0.05           | 0.00          | 0.15           |

Interrupted Time-series analysis model (ITSA) using ordinary least squares regression with Newey-West standard errors, lags specified: 4 weeks. Coefficients represent the estimates for the change in number of pediatric trauma team activations per week.

ACCEPTED



**Supplemental Table 5a. ITSA Model for the Differential Association of Shelter-in-Place with Violence-Related vs Non-Violent Injury Mechanisms (September 2019-June 2020)**

| <b>Variable</b>                                                                                                 | <b>Coefficient</b> | <b>Std Error</b> | <b>P-value</b> | <b>CI-Low</b> | <b>CI-High</b> |
|-----------------------------------------------------------------------------------------------------------------|--------------------|------------------|----------------|---------------|----------------|
| Difference in level of violence-related vs non-violent mechanisms, 6 mo prior to shelter-in-place               | -38.85             | 3.91             | <0.01          | -46.63        | -31.06         |
| Difference in weekly change for violence-related vs non-violent mechanisms, 6 mo prior to shelter-in-place      | 0.07               | 0.21             | 0.73           | -0.35         | 0.50           |
| Difference in level shifts for violence-related and non-violent mechanisms associated with shelter-in-place     | 27.28              | 3.74             | <0.01          | 19.83         | 34.73          |
| Difference in weekly change for violence-related vs non-violent mechanisms, after the start of shelter-in-place | -1.40              | 0.33             | <0.01          | -2.06         | -0.74          |
| After start of shelter-in-place weekly change in violence-related mechanisms                                    | 0.17               | 0.15             | 0.26           | -0.13         | 0.47           |
| After start of shelter-in-place weekly change in non-violent mechanisms                                         | 1.50               | 0.21             | <0.01          | 1.08          | 1.91           |

Multiple group interrupted time-series analysis model (ITSA) with Newey-West standard errors, lags specified: 4 weeks. Coefficients represent the estimates for the change in number of trauma team activations per week, compared by violence-related (all penetrating and blunt assaults, and self-harm) vs non-violent injury mechanisms (primarily falls, traffic related injuries, occupational injuries, and small volume of burns and other mechanisms)

**Supplemental Table 5b. Comparison of Trauma Volume by Mechanism of Injury Subtypes, Pre and Post Shelter in Place**

| <b>Mechanism Subtype</b>    | <b>Weekly Activations<br/>Pre-Shelter in Place</b> | <b>Weekly Activations<br/>Shelter-in-Place</b> | <b>P-Value*</b> |
|-----------------------------|----------------------------------------------------|------------------------------------------------|-----------------|
| <b>Violence Related</b>     |                                                    |                                                |                 |
| Stab wounds                 | 4.6 ( $\pm$ 2.2)                                   | 5.0 ( $\pm$ 1.9)                               | 0.60            |
| Blunt assaults              | 3.6 ( $\pm$ 1.8)                                   | 3.4 ( $\pm$ 2.3)                               | 0.79            |
| Gunshot wounds              | 2.2 ( $\pm$ 1.6)                                   | 3.1 ( $\pm$ 1.8)                               | 0.10            |
| Self-harm                   | 1.5 ( $\pm$ 1.2)                                   | 1.8 ( $\pm$ 1.1)                               | 0.47            |
| <b>Non-violence Related</b> |                                                    |                                                |                 |
| Falls                       | 24.3 ( $\pm$ 6.0)                                  | 15.5 ( $\pm$ 3.7)                              | <0.01           |
| Pedestrian vs auto          | 10.8 ( $\pm$ 3.6)                                  | 3.1 ( $\pm$ 2.2)                               | <0.01           |
| Motor vehicle collisions    | 8.6 ( $\pm$ 3.1)                                   | 6.3 ( $\pm$ 3.1)                               | 0.03            |
| Motorcycle collisions       | 5.7 ( $\pm$ 2.7)                                   | 2.8 ( $\pm$ 1.3)                               | <0.01           |
| Bicycle vs auto             | 4.5 ( $\pm$ 2.6)                                   | 5.8 ( $\pm$ 3.5)                               | 0.17            |

\*P-values based on two-sided t-tests comparing mean weekly trauma activations for each mechanism subtype for 6 months prior to shelter-in-place to 4 months following shelter in place.

**Supplemental Table 6. ITSA Model for Association of Shelter-in-Place with Monthly Reported Violent Crimes, San Francisco (2016-2020)**

| <b>Variable</b>                                         | <b>Coefficient</b> | <b>Std Error</b> | <b>P-value</b> | <b>CI-low</b> | <b>CI-high</b> |
|---------------------------------------------------------|--------------------|------------------|----------------|---------------|----------------|
| Pre-shelter-in-place trend (Jan 2016-Jan 2020)          | -0.60              | 0.38             | 0.12           | -1.37         | 0.17           |
| Level Shift associated with shelter-in-place            | -100.75            | 22.49            | 0.00           | -146.23       | -55.27         |
| Slope shift associated with shelter-in-place            | -21.30             | 10.79            | 0.06           | -43.13        | 0.53           |
| Trend after start of shelter-in-place (March-June 2020) | -21.90             | 10.88            | 0.05           | -43.91        | 0.11           |
| <b>Month (Reference, January)</b>                       |                    |                  |                |               |                |
| February                                                | -45.40             | 21.80            | 0.04           | -89.51        | -1.30          |
| March                                                   | 14.14              | 25.20            | 0.58           | -36.82        | 65.11          |
| April                                                   | -9.20              | 22.51            | 0.69           | -54.72        | 36.33          |
| May                                                     | 14.46              | 25.81            | 0.58           | -37.75        | 66.67          |
| June                                                    | 46.92              | 28.77            | 0.11           | -11.28        | 105.12         |
| July                                                    | 29.20              | 23.13            | 0.21           | -17.58        | 75.98          |
| August                                                  | 45.05              | 40.05            | 0.27           | -35.96        | 126.05         |
| September                                               | 48.65              | 24.01            | 0.05           | 0.07          | 97.22          |
| October                                                 | 59.74              | 28.04            | 0.04           | 3.03          | 116.45         |
| November                                                | 30.34              | 38.29            | 0.43           | -47.11        | 107.79         |
| December                                                | 24.69              | 28.54            | 0.39           | -33.03        | 82.41          |

Interrupted Time-series analysis model (ITSA) with Newey-West standard errors, lags specified: 12 months. Coefficients represent the estimates for the change in number of violent crimes reported by the San Francisco Police Department per month, January 2016- June 2020.

**Supplemental Table 7. ITSA Model for Association of Shelter-in-Place with Monthly Homicides, San Francisco (2016-2020)**

| <b>Variable</b>                                         | <b>Coefficient</b> | <b>Std Error</b> | <b>P-value</b> | <b>CI-low</b> | <b>CI-high</b> |
|---------------------------------------------------------|--------------------|------------------|----------------|---------------|----------------|
| Pre-shelter-in-place trend (Jan 2016-Jan 2020)          | -0.04              | 0.02             | 0.03           | -0.08         | -0.01          |
| Level Shift associated with shelter-in-place            | 2.28               | 0.86             | 0.01           | 0.53          | 4.03           |
| Slope shift associated with shelter-in-place            | -0.53              | 0.38             | 0.18           | -1.30         | 0.25           |
| Trend after start of shelter-in-place (March-June 2020) | -0.56              | 0.37             | 0.15           | -1.34         | 0.21           |
| <b>Month (Reference, January)</b>                       |                    |                  |                |               |                |
| February                                                | -1.16              | 1.09             | 0.29           | -3.36         | 1.04           |
| March                                                   | -0.17              | 1.15             | 0.88           | -2.50         | 2.16           |
| April                                                   | 0.18               | 1.60             | 0.91           | -3.05         | 3.41           |
| May                                                     | 0.73               | 1.53             | 0.64           | -2.37         | 3.82           |
| June                                                    | 1.88               | 1.06             | 0.08           | -0.26         | 4.01           |
| July                                                    | 1.20               | 1.04             | 0.25           | -0.90         | 3.30           |
| August                                                  | -0.76              | 1.38             | 0.59           | -3.55         | 2.04           |
| September                                               | 1.04               | 1.06             | 0.34           | -1.11         | 3.19           |
| October                                                 | 1.08               | 1.75             | 0.54           | -2.46         | 4.62           |
| November                                                | -1.38              | 1.07             | 0.21           | -3.55         | 0.80           |
| December                                                | 1.67               | 2.29             | 0.47           | -2.97         | 6.30           |

Interrupted time-series analysis model (ITSA) with Newey-West standard errors, for association of shelter-in-place with monthly homicides, accounting for historic and seasonal trends, lags specified: 12 months. Coefficients represent the estimates for the change in number of homicides reported by the San Francisco Police Department per month.

**Supplemental Table 8a. ITSA for Association of Shelter-in-Place with of Proportion of Male Trauma Patients (September 2019-June 2020)**

| <b>Variable</b>                      | <b>Coefficient</b> | <b>Std Error</b> | <b>P-Value</b> | <b>CI-low</b> | <b>CI-high</b> |
|--------------------------------------|--------------------|------------------|----------------|---------------|----------------|
| Trend, 6 months pre-Shelter-in-place | -0.06              | 0.10             | 0.52           | -0.26         | 0.13           |
| Level Shift March 17th 2020          | 8.08               | 2.68             | 0.00           | 2.67          | 13.49          |
| Slope Shift March 17th 2020          | -0.01              | 0.27             | 0.97           | -0.56         | 0.54           |
| Trend March 17th-June 30th 2020      | -0.07              | 0.25             | 0.77           | -0.58         | 0.43           |

Interrupted time-series analysis model (ITSA) with Newey-West standard errors, lags specified: 12 months. Coefficients represent the estimates for the change in weekly percentage of male trauma patients.

**Supplemental Table 8b. ITSA Model for Association of Shelter-in-Place with Mean Trauma Patient Age (September 2019-June 2020)**

| <b>Variable</b>                      | <b>Coefficient</b> | <b>Std Error</b> | <b>P-Value</b> | <b>CI-low</b> | <b>CI-high</b> |
|--------------------------------------|--------------------|------------------|----------------|---------------|----------------|
| Trend, 6 months pre-Shelter-in-place | 0.17               | 0.06             | 0.00           | 0.06          | 0.29           |
| Level Shift March 17th 2020          | 0.29               | 1.62             | 0.86           | -2.99         | 3.57           |
| Slope Shift March 17th 2020          | -0.61              | 0.18             | 0.00           | -0.99         | -0.24          |
| Trend March 17th-June 30th 2020      | -0.44              | 0.18             | 0.02           | -0.80         | -0.09          |

Interrupted time-series analysis model (ITSA) using ordinary least squares regression and Newey-West standard errors, lags specified: 12 months. Coefficients represent the estimates for the change in weekly mean age of trauma patients.

**Supplemental Table 8c. ITSA Models for the Association of Shelter-in-Place with Percentages of Trauma Patients Categorized by Race/Ethnicity (September 2019-June 2020)**

| Variable                               | Coefficient | Std Error | P-Value | CI-low | CI-high |
|----------------------------------------|-------------|-----------|---------|--------|---------|
| <b>6 months pre-Shelter-in-place</b>   |             |           |         |        |         |
| White                                  | -0.09       | 0.11      | 0.40    | -0.31  | 0.12    |
| Black                                  | 0.02        | 0.07      | 0.82    | -0.13  | 0.16    |
| Asian                                  | 0.27        | 0.10      | 0.01    | 0.08   | 0.47    |
| Latinx                                 | -0.08       | 0.09      | 0.36    | -0.25  | 0.09    |
| Other                                  | -0.06       | 0.05      | 0.23    | -0.16  | 0.04    |
| Unknown                                | -0.06       | 0.05      | 0.19    | -0.15  | 0.03    |
| <b>Level Shift March 17th 2020</b>     |             |           |         |        |         |
| White                                  | 11.47       | 5.03      | 0.03    | 1.31   | 21.64   |
| Black                                  | 0.68        | 2.34      | 0.77    | -4.05  | 5.41    |
| Asian                                  | -7.84       | 2.44      | <0.01   | -12.78 | -2.91   |
| Latinx                                 | -2.70       | 2.06      | 0.20    | -6.85  | 1.46    |
| Other                                  | -0.43       | 1.37      | 0.75    | -3.20  | 2.33    |
| Unknown                                | -1.18       | 1.14      | 0.31    | -3.48  | 1.12    |
| <b>Slope Shift March 17th</b>          |             |           |         |        |         |
| White                                  | -1.31       | 0.39      | <0.01   | -2.10  | -0.51   |
| Black                                  | 0.32        | 0.20      | 0.13    | -0.10  | 0.73    |
| Asian                                  | -0.09       | 0.31      | 0.77    | -0.71  | 0.53    |
| Latinx                                 | 0.37        | 0.32      | 0.26    | -0.29  | 1.02    |
| Other                                  | -0.20       | 0.10      | 0.06    | -0.01  | 0.42    |
| Unknown                                | 0.50        | 0.12      | <0.01   | 0.26   | 0.74    |
| <b>Trend March 17th-June 30th 2020</b> |             |           |         |        |         |
| White                                  | -1.39       | 0.40      | <0.01   | -2.21  | -0.58   |
| Black                                  | 0.33        | 0.19      | 0.09    | -0.06  | 0.72    |
| Asian                                  | 0.17        | 0.29      | 0.52    | -0.39  | 0.77    |
| Latinx                                 | 0.29        | 0.31      | 0.37    | 0.35   | 0.92    |
| Other                                  | 0.15        | 0.10      | 0.15    | -0.10  | 0.35    |
| Unknown                                | 0.44        | 0.11      | <0.01   | 0.22   | 0.66    |

Interrupted time-series analysis models (ITSA) with Newey-West standard errors, lags specified: 12 months. Coefficients represent the estimates for the change in weekly mean percentage of each race/ethnicity category of trauma patients.
